# Supplementary material
Source: Springer Nature journal article supplement (https://www.springerprofessional.de/resource/supplementary/13638_2011_191_MOESM12_ESM.pdf/11897134)

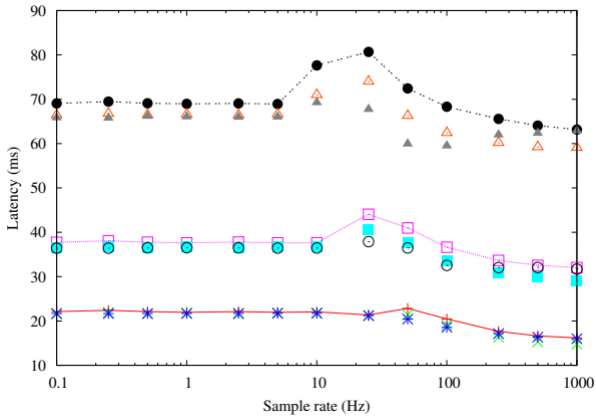

Supplement: MOESM12 [file 11897134]
